# Supplementary material for: Prognostic Value of Serum Lambda Free Light Chains in Nasopharyngeal Carcinoma
Source: Research Square preprint supplement (doi:10.21203/rs.3.rs-7917303/v1), 2025-11-10
Supplement: Supplementary file 1 [file 61e8f18e3c350e66795b1572.docx]

**Supplementary Information**

**
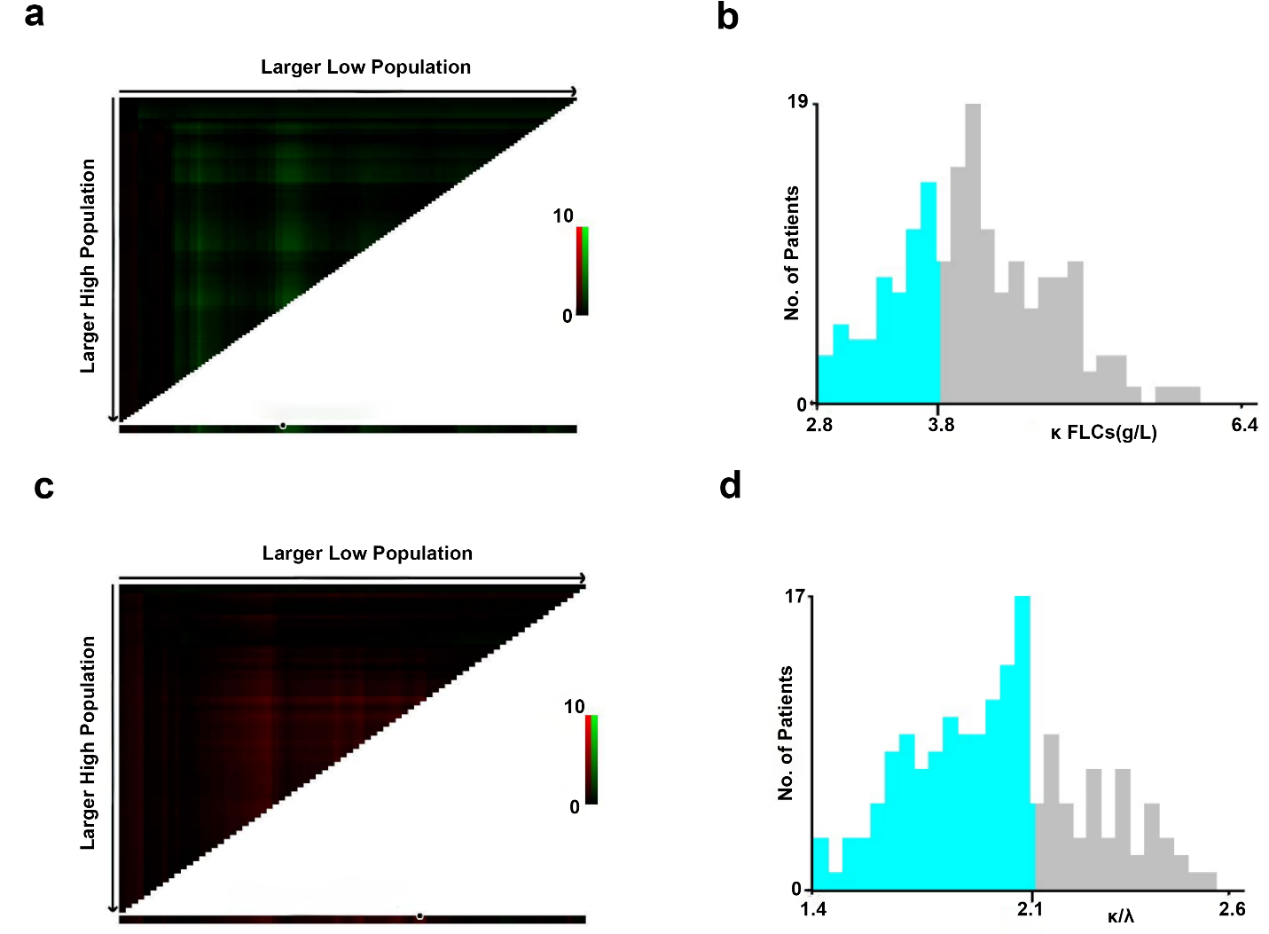
**

**Supplementary Figure 1** The optimal cutoff values for serum κ FLC level and κ/λ in the 5-year PFS analysis were calculated via the X-tile tool; the optimal cutoff value for κ FLCs was 3.8 g/L (**a-b**) and the optimal cutoff value for κ/λ was 2.1 (**c-d**).


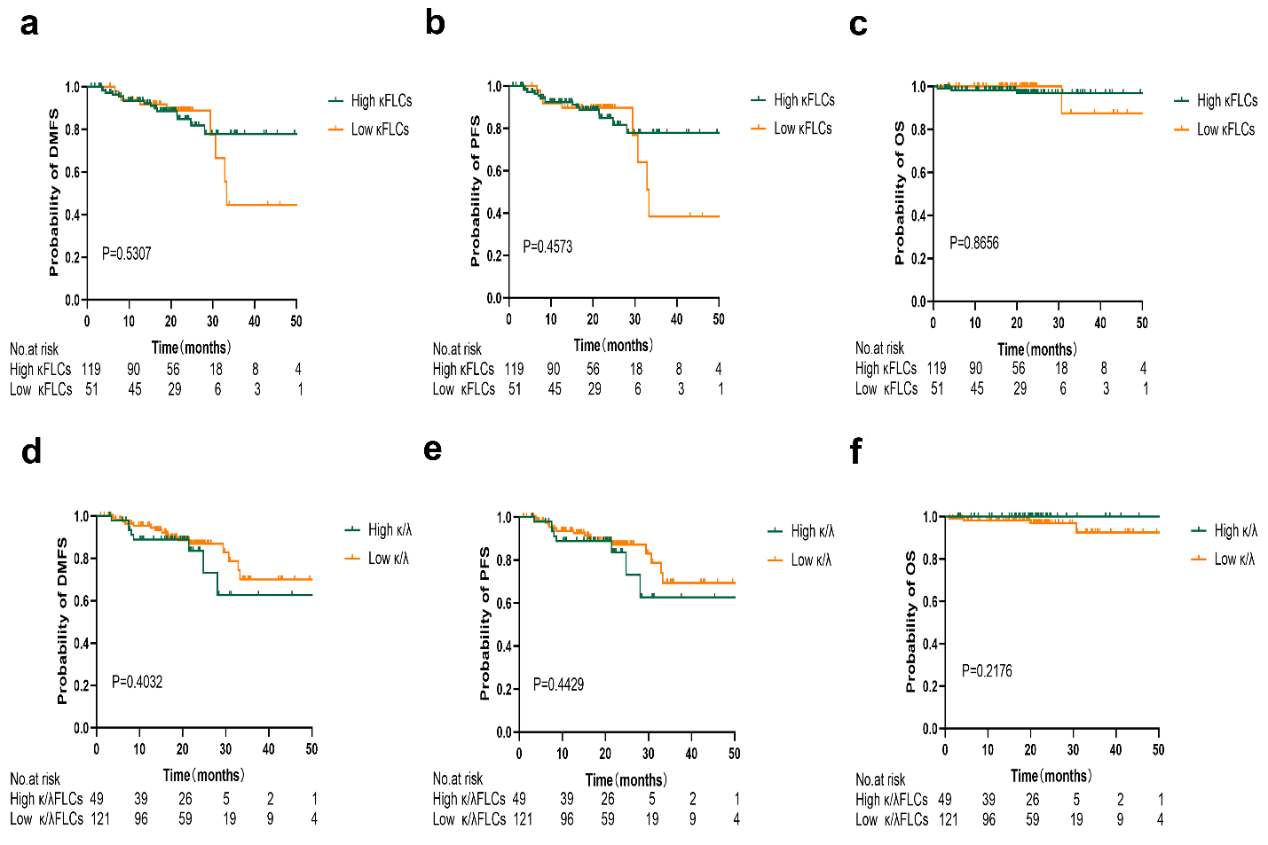


**Supplementary Figure 2** Kaplan‒Meier curves of distant metastasis-free survival (**a**), progression-free survival (**b**), and overall survival (**c**) for NPC patients (n = 170) grouped according to pretreatment κ FLC levels. Kaplan‒Meier curves of distant metastasis-free survival (**d**), progression-free survival (**e**), and overall survival (**f**) for NPC patients (n = 170) grouped according to pretreatment κ/λ values.
